# Supplementary material for: Linked Colour imaging for the detection of polyps in patients with Lynch syndrome: a multicentre, parallel randomised controlled trial
Source: HighWire-hosted journal article supplement (doi:10.1136/gutjnl-2020-323132), 2021-03-18
Supplement: gutjnl-2020-323132supp001_data_supplement.pdf [file gutjnl-2020-323132supp001_data_supplement.pdf]

**Supplementary 1: Characteristics of the five patients with a carcinoma detected**

|                                                | Case 1        | Case 2     | Case 3          | Case 4          | Case 5        |
|------------------------------------------------|---------------|------------|-----------------|-----------------|---------------|
| Age, gender                                    | 61, male      | 49, female | 54, male        | 55, male        | 63, female    |
| Type pathogenic gene variant                   | MSH2          | MLH1       | MSH2            | MLH1            | MSH2          |
| Surveillance interval in months                | 12            | 12         | 14              | 12              | 13            |
| Neoplasia detected during previous colonoscopy | No            | No         | Yes             | No              | No            |
| History of colorectal cancer                   | No            | No         | Yes             | Yes             | Yes           |
| Tumour size in mm                              | 6             | 26         | 10              | 35              | 15            |
| Tumour location                                | Ascending     | Caecum     | Hepatic flexure | Hepatic flexure | Ascending     |
| Tumour morphology                              | Flat elevated | Flat       | Flat elevated   | Flat elevated   | Flat elevated |
| Tumour stage                                   | I             | I          | I               | III             | I             |
