# Supplementary material for: Linked Colour imaging for the detection of polyps in patients with Lynch syndrome: a multicentre, parallel randomised controlled trial
Source: PubMed Central journal article supplement — Gut. 2021 Mar 18;71(3):553–60. doi: 10.1136/gutjnl-2020-323132 (PMC8862075; doi:10.1136/gutjnl-2020-323132), 2021-03-18
Supplement: gutjnl-2020-323132supp002.pdf [file gutjnl-2020-323132supp002.pdf]

**Supplementary 2: Sensitivity analyses for polyp detection outcomes in patients with previous surgery due to colorectal cancer (A) and more specific for patients with previous right (extended) hemicolectomy (B)**

A. Patients with previous surgery due to colorectal cancer

|                                          | <b>Linked Colour imaging (N=35)</b> | <b>High-definition white-light endoscopy (N=37)</b> | <b>Risk ratio (2-sided 95% CI)</b>           | <b>P-value (2-sided)</b> |
|------------------------------------------|-------------------------------------|-----------------------------------------------------|----------------------------------------------|--------------------------|
| <b>Polyp detection rates</b>             |                                     |                                                     |                                              |                          |
| Polyps <sup>a</sup>                      | 14 (40%)                            | 18 (49%)                                            | 0.82 (0.49-1.39)                             | 0.46                     |
| Adenomas                                 | 12 (34.3%)                          | 12 (32.4%)                                          | 1.06 (0.55-2.03)                             | 0.87                     |
| <b>Mean number of polyps per patient</b> |                                     |                                                     |                                              |                          |
|                                          |                                     |                                                     | <b>Incidence Rate Ratio (2-sided 95% CI)</b> | <b>P-value (2-sided)</b> |
| Polyps <sup>a</sup>                      | 0.91 (1.52)                         | 0.89 (1.33)                                         | 1.03 (0.49-2.13)                             | 0.95                     |
| Adenomas                                 | 0.74 (1.38)                         | 0.62 (1.11)                                         | 1.19 (0.49-2.90)                             | 0.69                     |

B. Patients with previous right (extended) hemicolectomy

|                                          | <b>Linked Colour imaging (N=15)</b> | <b>High-definition white-light endoscopy (N=14)</b> | <b>Risk ratio (2-sided 95% CI)</b>           | <b>P-value (2-sided)</b> |
|------------------------------------------|-------------------------------------|-----------------------------------------------------|----------------------------------------------|--------------------------|
| <b>Polyp detection rates</b>             |                                     |                                                     |                                              |                          |
| Polyps <sup>a</sup>                      | 4 (26.7%)                           | 5 (35.7%)                                           | 0.75 (0.25-2.23)                             | 0.61                     |
| Adenomas                                 | 2 (13.3%)                           | 3 (21.4%)                                           | 0.62 (0.12-3.19)                             | 0.57                     |
| <b>Mean number of polyps per patient</b> |                                     |                                                     |                                              |                          |
|                                          |                                     |                                                     | <b>Incidence Rate Ratio (2-sided 95% CI)</b> | <b>P-value (2-sided)</b> |
| Polyps <sup>a</sup>                      | 0.53 (1.06)                         | 0.43 (0.65)                                         | 1.24 (0.33-4.76)                             | 0.75                     |
| Adenomas                                 | 0.27 (0.80)                         | 0.29 (0.61)                                         | 0.93 (0.13-6.60)                             | 0.94                     |

<sup>a</sup>1-5 mm hyperplastic polyps in the rectosigmoid, normal mucosa, other non-neoplastic lesions and lesions not retrieved for pathology were excluded. <sup>b</sup>Morphology 0-IIa, 0-IIb, or IIc according to Paris classification. <sup>c</sup>Proximal to splenic flexure. \*P < 0.05, \*\*P < 0.01. CI: confidence interval
