# Supplementary material for: Linked Colour imaging for the detection of polyps in patients with Lynch syndrome: a multicentre, parallel randomised controlled trial
Source: HighWire-hosted journal article supplement (doi:10.1136/gutjnl-2020-323132), 2021-03-18
Supplement: gutjnl-2020-323132supp003_data_supplement.pdf [file gutjnl-2020-323132supp003_data_supplement.pdf]

**Supplementary 3: Sensitivity analysis for polyp detection outcomes adjusted by centre**

|                                          | <b>Linked Colour<br/>imaging<br/>(N=160)</b> | <b>High-definition<br/>white-light<br/>endoscopy (N=172)</b> | <b>Risk ratio<sup>^</sup><br/>(2-sided 95% CI)</b> | <b>P-value<sup>^</sup><br/>(2-sided)</b> |
|------------------------------------------|----------------------------------------------|--------------------------------------------------------------|----------------------------------------------------|------------------------------------------|
| <b>Polyp detection rates</b>             |                                              |                                                              |                                                    |                                          |
| Polyps <sup>a</sup>                      | 71 (44.4%)                                   | 62 (36.0%)                                                   | 1.21 (0.92-1.58)                                   | 0.14                                     |
| Adenomas                                 | 58 (36.3%)                                   | 44 (25.6%)                                                   | 1.68 (1.03-2.77)                                   | 0.04*                                    |
| Flat adenomas <sup>b</sup>               | 27 (16.9%)                                   | 20 (11.6%)                                                   | 1.53 (0.80-2.95)                                   | 0.20                                     |
| ≤ 5 mm adenomas                          | 52 (32.5%)                                   | 38 (22.1%)                                                   | 1.44 (1.00-2.07)                                   | 0.04*                                    |
| Proximal adenomas <sup>c</sup>           | 45 (28.1%)                                   | 32 (18.6%)                                                   | 1.48 (1.00-2.22)                                   | 0.05*                                    |
| Serrated polyps                          | 28 (17.5%)                                   | 24 (14.0%)                                                   | 1.22 (0.73-2.05)                                   | 0.42                                     |
| <b>Mean number of polyps per patient</b> |                                              |                                                              |                                                    |                                          |
|                                          |                                              |                                                              | <b>Incidence Rate Ratio<br/>(2-sided 95% CI)</b>   | <b>P-value<sup>^</sup><br/>(2-sided)</b> |
| Polyps <sup>a</sup>                      | 0.94 (1.40)                                  | 0.62 (1.14)                                                  | 1.48 (1.05-2.10)                                   | 0.03*                                    |
| Adenomas                                 | 0.65 (1.11)                                  | 0.42 (0.92)                                                  | 1.55 (1.03-2.32)                                   | 0.03*                                    |
| Flat adenomas <sup>b</sup>               | 0.28 (0.75)                                  | 0.19 (0.63)                                                  | 1.64 (0.87-3.10)                                   | 0.12                                     |
| ≤ 5 mm adenomas                          | 0.54 (1.00)                                  | 0.34 (0.76)                                                  | 1.58 (1.03-2.43)                                   | 0.04*                                    |
| Proximal adenomas <sup>c</sup>           | 0.46 (0.92)                                  | 0.26 (0.63)                                                  | 1.82 (1.13-2.91)                                   | 0.01*                                    |
| Serrated polyps                          | 0.29 (0.76)                                  | 0.17 (0.49)                                                  | 1.51 (0.84-2.70)                                   | 0.17                                     |

Data are n(%) or mean (SD). <sup>a</sup>1-5 mm hyperplastic polyps in the rectosigmoid, normal mucosa, other non-neoplastic lesions and lesions not retrieved for pathology were excluded. <sup>b</sup>Morphology 0-IIa, 0-IIb, or IIc according to Paris classification. <sup>c</sup>Proximal to splenic flexure. <sup>^</sup>Adjusted for center. \* $P < 0.05$ , \*\* $P < 0.01$ . CI: confidence interval.
