# Supplementary figures and images for: Linked Colour imaging for the detection of polyps in patients with Lynch syndrome: a multicentre, parallel randomised controlled trial
Source: PubMed Central journal article supplement — Gut. 2021 Mar 18;71(3):553–60. doi: 10.1136/gutjnl-2020-323132 (PMC8862075; doi:10.1136/gutjnl-2020-323132), 2021-03-18

## Supplemental 4: Polyp detection rates and mean number of polyps per centre

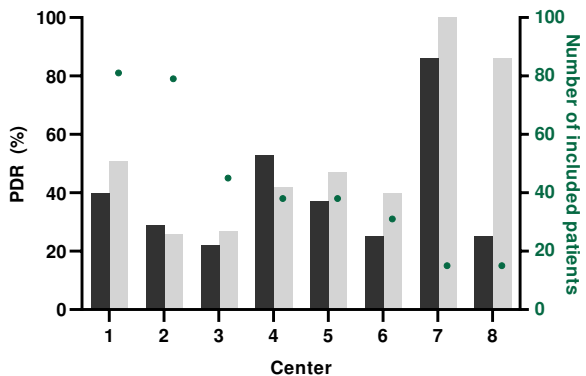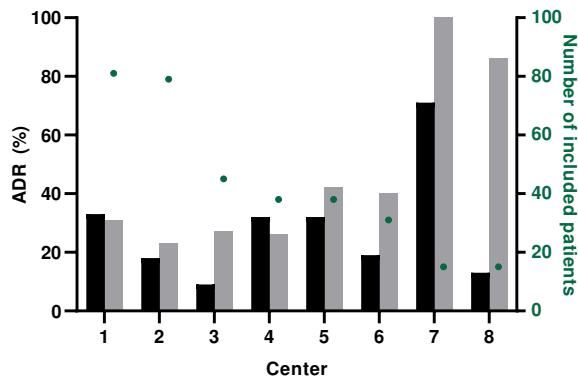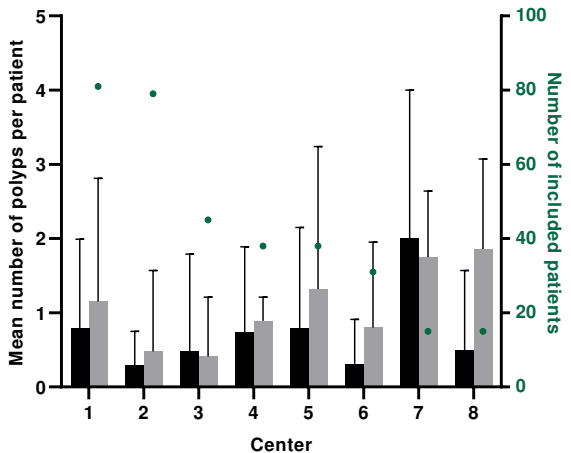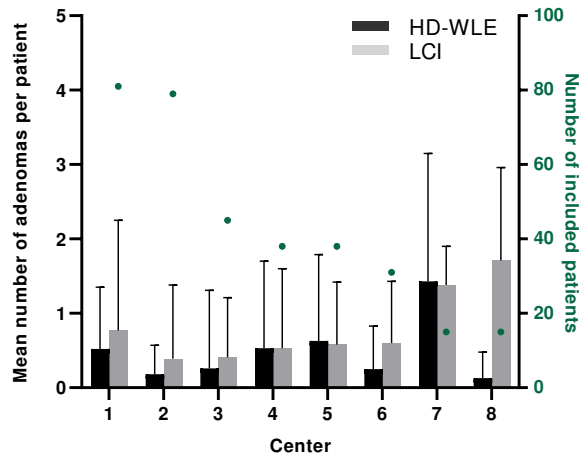

Supplement: gutjnl-2020-323132supp004.pdf [file gutjnl-2020-323132supp004.pdf]
