# Supplementary figures and images for: Linked Colour imaging for the detection of polyps in patients with Lynch syndrome: a multicentre, parallel randomised controlled trial
Source: HighWire-hosted journal article supplement (doi:10.1136/gutjnl-2020-323132), 2021-03-18

## Supplemental 4: Polyp detection rates and mean number of polyps per centre

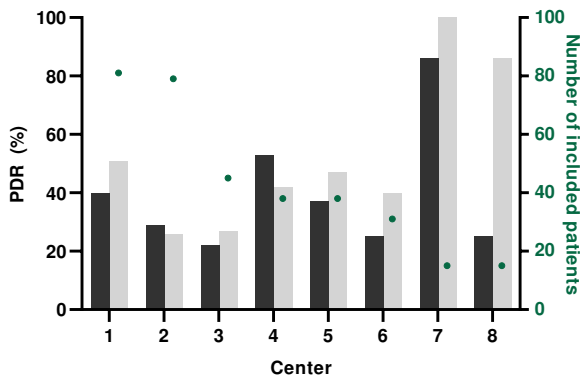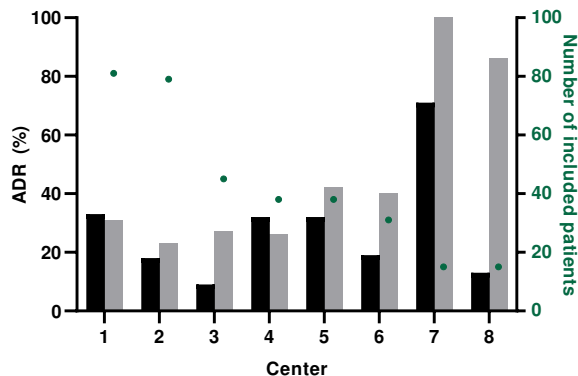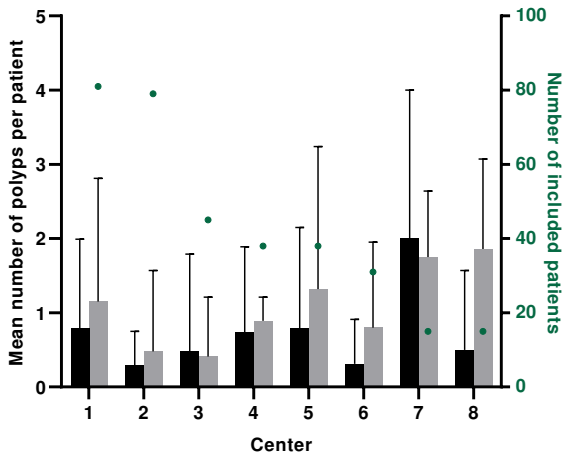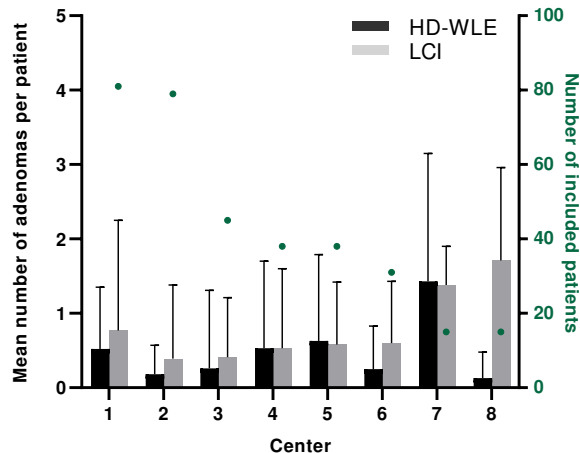

Supplement: gutjnl-2020-323132supp004_data_supplement.pdf [file gutjnl-2020-323132supp004_data_supplement.pdf]

## Supplemental 4: Polyp detection rates and mean number of polyps per centre

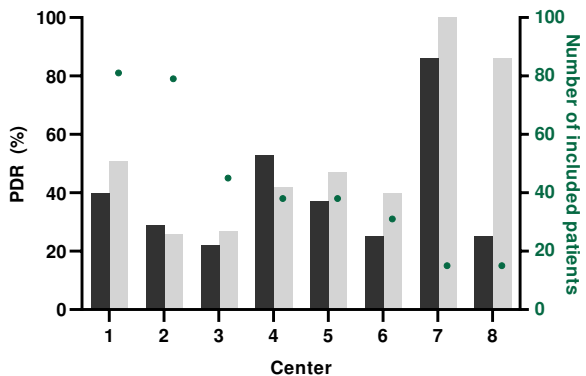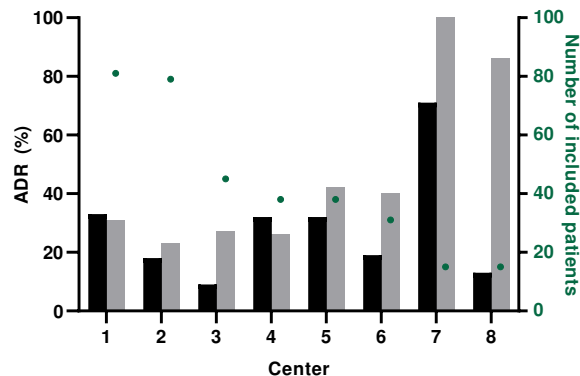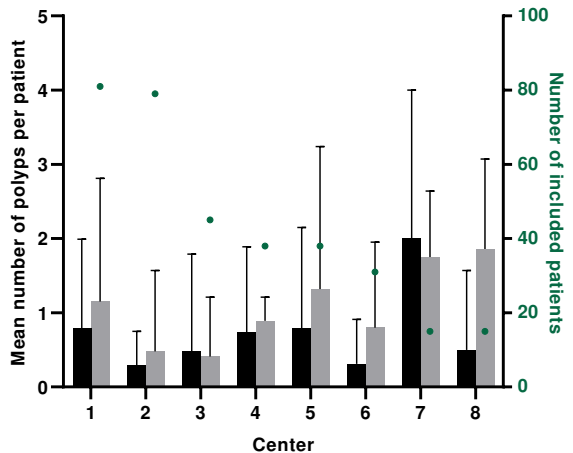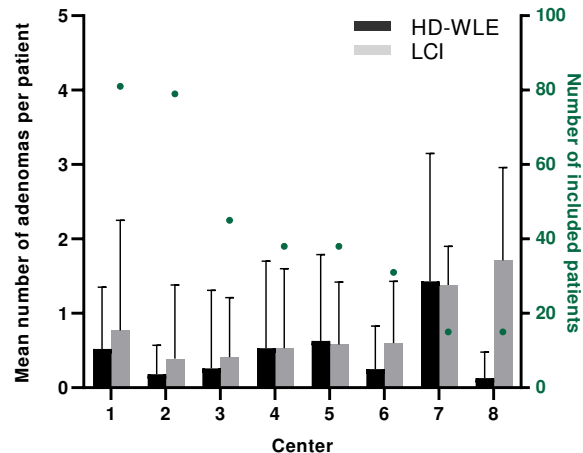

Supplement: gutjnl-2020-323132supp004_data_supplement.pdf [file gutjnl-2020-323132supp004_data_supplement.pdf]
